# Supplementary material for: Vertically oriented mesoporous silica film modified fluorine-doped tin oxide electrode for enhanced electrochemiluminescence detection of lidocaine in serum
Source: Royal Society of Chemistry journal article supplement (doi:10.1039/d1ra06375h), 2021-01-01
Supplement: d1ra06375h1.pdf [file d1ra06375h1.pdf]

Table S1 Comparison between detection of lidocaine using different methods.

| Material                                                                           | Method      | Linear range        | Detection limit | References |
|------------------------------------------------------------------------------------|-------------|---------------------|-----------------|------------|
|                                                                                    |             | ( $\mu\text{M}$ )   | (nM)            |            |
| luminol-SiNPs/GCE                                                                  | ECL         | 0.5-100             | 92.5            | 33         |
| SA-DLLME-FASS                                                                      | CE          | 0.05–1              | 10              | 34         |
| N-CDs                                                                              | Fluorescent | 185.0-1295.0        | 54000           | 35         |
| HF-LLLME                                                                           | HPLC        | 0.2-8.5             | 42.6            | 36         |
| Fe <sub>3</sub> O <sub>4</sub> @SiO <sub>2</sub> -C <sub>18</sub><br>nanoparticles | HPLC        | 0.2-10.6            | 42.6            | 37         |
| 3D GPE                                                                             | ECL         | 0.01-10<br>50-10000 | 7.8             | 38         |
| VMSE/FTO                                                                           | ECL         | 0.01-50             | 8               | our work   |

luminol-SiNPs, luminol-doped silica nanoparticles; GCE, glassy carbon electrode; SA-DLLME-FASS, Surfactant-assisted-dispersive liquid-liquid microextraction-field-amplified sample stacking; CE, capillary electrophoresis; N-CDs, N doped carbon dots; HF-LLLME, hollow fiber liquid-liquid-liquid microextraction; HPLC, high-performance liquid chromatography; Fe<sub>3</sub>O<sub>4</sub>@SiO<sub>2</sub>-C<sub>18</sub>, C18-functionalized magnetic silica nanoparticles; 3D GPE, 3D graphene paper electrode.
